# Supplementary material for: Manipulating macrophage polarization with nanoparticles to control metastatic behavior in heterotypic breast cancer micro-tissues via exosome signaling
Source: Royal Society of Chemistry journal article supplement (doi:10.1039/d3nr04980a), 2023-12-05
Supplement: d3nr04980a1.xlsx [file d3nr04980a1.xlsx]

## Sheet: Control-M1-Exo
Significant	-LOG(p-value)	Difference	Protein names	Gene names
+	2.16098	1.5003	Ubiquitin-like protein ISG15	ISG15
+	4.64091	-0.667639	Dihydropyrimidinase-related protein 2	DPYSL2
+	1.92899	1.39825	NHP2-like protein 1	NHP2L1
+	3.04794	-0.885631	Pyridoxal kinase	PDXK
+	2.51175	0.685303	PCTP-like protein	STARD10
+	2.70824	1.12484	Nuclease-sensitive element-binding protein 1	YBX1
+	2.59249	1.14317	Heterogeneous nuclear ribonucleoprotein D0	HNRNPD
+	4.03761	1.53908	Serine/arginine-rich splicing factor 1	SRSF1
+	3.61127	3.10702	Transmembrane protein 205	TMEM205
+	2.42711	-0.995537	Tumor protein D54	TPD52L2
+	1.93217	-1.12055	DnaJ homolog subfamily A member 2	DNAJA2
+	2.48341	0.671175	Vesicle-associated membrane protein-associated protein B/C	VAPB
+	2.76197	-0.639524	GTPase Nras	NRAS
+	1.79794	2.29402	Prelamin-A/C	LMNA
+	2.48671	0.60749	Annexin A2	ANXA2
+	1.73662	1.87119	U1 small nuclear ribonucleoprotein 70 kDa	SNRNP70
+	3.95803	0.708503	High mobility group protein B1	HMGB1
+	2.76062	0.94021	Sarcoplasmic/endoplasmic reticulum calcium ATPase 2	ATP2A2
+	1.78308	-1.67639	Glutathione S-transferase Mu 3	GSTM3
+	2.38235	0.859104	ATP synthase subunit alpha, mitochondrial	ATP5A1
+	2.15688	0.839761	Cytochrome b-c1 complex subunit 1, mitochondrial	UQCRC1
+	1.76278	-1.33461	ADP-ribosylation factor-like protein 3	ARL3
+	2.70947	-0.56439	Ubiquitin carboxyl-terminal hydrolase 8	USP8
+	2.89671	-0.776925	40S ribosomal protein S5;40S ribosomal protein S5, N-terminally processed	RPS5
+	1.86681	1.24878	Emerin	EMD
+	2.90097	2.07265	Carnitine O-palmitoyltransferase 1, liver isoform	CPT1A
+	2.61609	-2.20131	Diphosphomevalonate decarboxylase	MVD
+	2.03198	-1.37496	Large neutral amino acids transporter small subunit 1	SLC7A5
+	3.21684	-0.792875	1,4-alpha-glucan-branching enzyme	GBE1
+	2.57699	0.739799	Delta(3,5)-Delta(2,4)-dienoyl-CoA isomerase, mitochondrial	ECH1
+	1.79941	-1.29159	Reticulocalbin-1	RCN1
+	3.28131	-0.980323	Drebrin	DBN1
+	3.55441	-0.787473	Plasminogen activator inhibitor 1 RNA-binding protein	SERBP1
+	1.99127	1.01432	Cytosolic non-specific dipeptidase	CNDP2
+	2.00487	-1.21578	Prefoldin subunit 5	PFDN5
+	2.13602	1.20963	Charged multivesicular body protein 4b	CHMP4B
+	2.64082	1.10806	Sideroflexin-1	SFXN1
+	2.21763	0.904033	Protein S100-A14	S100A14
+	3.4383	-0.483794	Protein-arginine deiminase type-2	PADI2
+	2.5744	1.98111	2-5-oligoadenylate synthase 3	OAS3

## Sheet: Control-PdNPs-Exo
Significant	-LOG(p-value)	Difference	Protein names	Gene names
+	2.49513	0.705957	ATPase ASNA1	ASNA1
+	2.10165	1.21107	Proteasome activator complex subunit 2	PSME2
+	1.95752	1.47935	Ubiquitin-like protein ISG15	ISG15
+	1.92698	1.24468	HLA class I histocompatibility antigen, A alpha chain	HLA-A
+	2.81069	-0.669392	Dihydropyrimidinase-related protein 2	DPYSL2
+	2.25687	-0.763315	Glycine cleavage system H protein, mitochondrial	GCSH
+	2.81637	-1.09411	26S proteasome non-ATPase regulatory subunit 10	PSMD10
+	2.39801	1.34247	2,4-dienoyl-CoA reductase, mitochondrial	DECR1
+	4.53596	0.587363	Adipocyte plasma membrane-associated protein	APMAP
+	2.10575	1.36955	Serine/arginine-rich splicing factor 1	SRSF1
+	3.19024	2.72845	Transmembrane protein 205	TMEM205
+	2.8167	-0.823037	Tumor protein D54	TPD52L2
+	2.01437	2.11383	Prelamin-A/C	LMNA
+	2.32927	0.736507	Heat shock protein beta-1	HSPB1
+	2.34651	0.906964	Keratin, type I cytoskeletal 18	KRT18
+	2.79043	0.732103	Sarcoplasmic/endoplasmic reticulum calcium ATPase 2	ATP2A2
+	2.76668	0.617348	Acetyl-CoA acetyltransferase, mitochondrial	ACAT1
+	2.82849	0.839838	ATP synthase subunit alpha, mitochondrial	ATP5A1
+	2.06512	-0.867193	60S ribosomal protein L13	RPL13
+	3.34192	0.692532	Flavin reductase (NADPH)	BLVRB
+	2.51749	0.652459	Cytochrome b-c1 complex subunit 1, mitochondrial	UQCRC1
+	2.147	-1.62509	ADP-ribosylation factor-like protein 3	ARL3
+	1.79442	1.14368	ATP synthase subunit gamma, mitochondrial	ATP5C1
+	2.21328	-0.925707	Aldo-keto reductase family 1 member C2	AKR1C2
+	2.32757	-1.85359	Diphosphomevalonate decarboxylase	MVD
+	2.05197	0.782239	Guanine nucleotide-binding protein G(I)/G(S)/G(T) subunit beta-1	GNB1
+	2.9039	1.04205	Ubiquitin-40S ribosomal protein S27a	RPS27A
+	2.30324	-1.02214	SUMO-conjugating enzyme UBC9	UBE2I
+	4.62073	0.763729	Interleukin enhancer-binding factor 3	ILF3
+	3.49974	0.959978	Delta(3,5)-Delta(2,4)-dienoyl-CoA isomerase, mitochondrial	ECH1
+	1.69688	1.61094	Zinc finger protein 638	ZNF638
+	1.97969	-1.0861	Drebrin	DBN1
+	2.81676	-1.78203	5-nucleotidase domain-containing protein 1	NT5DC1
+	2.14288	0.979131	Protein phosphatase 1 regulatory subunit 14B	PPP1R14B
+	2.39336	-0.986021	Prefoldin subunit 5	PFDN5
+	2.65721	1.00305	Sideroflexin-1	SFXN1
+	2.3256	-0.667965	GTP-binding protein SAR1a	SAR1A
+	2.55421	0.742811	Calcium-binding mitochondrial carrier protein Aralar2	SLC25A13
+	1.97765	1.29069	2-5-oligoadenylate synthase 3	OAS3

## Sheet: M1-PdNPs-Exo
Significant	-LOG(p-value)	Difference	Protein names	Gene names
+	2.66434	-0.851593	Alpha-endosulfine	ENSA
+	2.33186	-1.81654	26S proteasome non-ATPase regulatory subunit 10	PSMD10
+	2.80491	-0.831911	Hexokinase-1	HK1
+	3.00081	0.704264	Ubiquitin thioesterase OTUB1	OTUB1
+	3.34644	-0.890268	cAMP-regulated phosphoprotein 19	ARPP19
+	2.97127	-1.03978	High mobility group protein B2	HMGB2
+	2.62747	-0.8286	Constitutive coactivator of PPAR-gamma-like protein 1	FAM120A
