# Supplementary material for: Manipulating macrophage polarization with nanoparticles to control metastatic behavior in heterotypic breast cancer micro-tissues via exosome signaling
Source: Royal Society of Chemistry journal article supplement (doi:10.1039/d3nr04980a), 2023-12-05
Supplement: d3nr04980a2.xlsx [file d3nr04980a2.xlsx]

## Sheet: cellular component
Reference List:	Homo sapiens (all genes in database)
Test Type:	FISHER
Correction:	FDR
GO cellular component complete	Homo sapiens - REFLIST (20589)	Enrichment Analysis.txt (39)	Enrichment Analysis.txt (expected)	Enrichment Analysis.txt (over/under)	Enrichment Analysis.txt (fold Enrichment)	Enrichment Analysis.txt (raw P-value)	Enrichment Analysis.txt (FDR)
mitochondrial proton-transporting ATP synthase complex, catalytic sector F(1) (GO:0000275)	6	2	0.01	+	> 100	9.68e-05	0.032
proton-transporting ATP synthase complex, catalytic core F(1) (GO:0045261)	7	2	0.01	+	> 100	0.000124	0.0352
extracellular exosome (GO:0070062)	2101	13	3.98	+	3.27	8.3e-05	0.0822
extracellular vesicle (GO:1903561)	2124	13	4.02	+	3.23	9.28e-05	0.0613
extracellular organelle (GO:0043230)	2125	13	4.03	+	3.23	9.33e-05	0.0462
extracellular membrane-bounded organelle (GO:0065010)	2125	13	4.03	+	3.23	9.33e-05	0.037
cytoplasm (GO:0005737)	12152	36	23.02	+	1.56	5.11e-06	0.0101

## Sheet: Reactome pathway
Test Type:	FISHER
Correction:	FDR
Reactome pathways	Homo sapiens - REFLIST (20589)	Enrichment Analysis.txt (39)	Enrichment Analysis.txt (expected)	Enrichment Analysis.txt (over/under)	Enrichment Analysis.txt (fold Enrichment)	Enrichment Analysis.txt (raw P-value)	Enrichment Analysis.txt (FDR)
Formation of ATP by chemiosmotic coupling (R-HSA-163210)	18	2	0.03	+	58.66	0.000648	0.0215
AUF1 (hnRNP D0) binds and destabilizes mRNA (R-HSA-450408)	53	4	0.1	+	39.84	4.01e-06	0.005
Translation of Structural Proteins (R-HSA-9683701)	29	2	0.05	+	36.41	0.00156	0.0402
Cristae formation (R-HSA-8949613)	31	2	0.06	+	34.06	0.00177	0.0437
Termination of translesion DNA synthesis (R-HSA-5656169)	32	2	0.06	+	33	0.00188	0.0455
Regulation of activated PAK-2p34 by proteasome mediated degradation (R-HSA-211733)	49	3	0.09	+	32.32	0.00013	0.0323
Autodegradation of the E3 ubiquitin ligase COP1 (R-HSA-349425)	51	3	0.1	+	31.05	0.000145	0.0329
Vpu mediated degradation of CD4 (R-HSA-180534)	51	3	0.1	+	31.05	0.000145	0.0301
Ubiquitin-dependent degradation of Cyclin D (R-HSA-75815)	51	3	0.1	+	31.05	0.000145	0.0278
p53-Independent G1/S DNA damage checkpoint (R-HSA-69613)	51	3	0.1	+	31.05	0.000145	0.0258
p53-Independent DNA Damage Response (R-HSA-69610)	51	3	0.1	+	31.05	0.000145	0.0241
Ubiquitin Mediated Degradation of Phosphorylated Cdc25A (R-HSA-69601)	51	3	0.1	+	31.05	0.000145	0.0226
Negative regulation of NOTCH4 signaling (R-HSA-9604323)	52	3	0.1	+	30.46	0.000153	0.0225
Vif-mediated degradation of APOBEC3G (R-HSA-180585)	52	3	0.1	+	30.46	0.000153	0.0212
Regulation of Apoptosis (R-HSA-169911)	52	3	0.1	+	30.46	0.000153	0.0201
Regulation of RUNX3 expression and activity (R-HSA-8941858)	53	3	0.1	+	29.88	0.000162	0.0201
FBXL7 down-regulates AURKA during mitotic entry and in early mitosis (R-HSA-8854050)	54	3	0.1	+	29.33	0.00017	0.0193
SCF-beta-TrCP mediated degradation of Emi1 (R-HSA-174113)	54	3	0.1	+	29.33	0.00017	0.0185
Degradation of AXIN (R-HSA-4641257)	54	3	0.1	+	29.33	0.00017	0.0177
Hh mutants are degraded by ERAD (R-HSA-5362768)	55	3	0.1	+	28.8	0.000179	0.0179
Stabilization of p53 (R-HSA-69541)	55	3	0.1	+	28.8	0.000179	0.0172
ROS sensing by NFE2L2 (R-HSA-8932339)	56	3	0.11	+	28.28	0.000189	0.0174
Degradation of DVL (R-HSA-4641258)	56	3	0.11	+	28.28	0.000189	0.0168
CDT1 association with the CDC6:ORC:origin complex (R-HSA-68827)	58	3	0.11	+	27.31	0.000208	0.0179
NIK-->noncanonical NF-kB signaling (R-HSA-5676590)	58	3	0.11	+	27.31	0.000208	0.0173
Hh mutants abrogate ligand secretion (R-HSA-5387390)	58	3	0.11	+	27.31	0.000208	0.0168
SCF(Skp2)-mediated degradation of p27/p21 (R-HSA-187577)	59	3	0.11	+	26.84	0.000219	0.017
GLI3 is processed to GLI3R by the proteasome (R-HSA-5610785)	59	3	0.11	+	26.84	0.000219	0.0165
Degradation of GLI2 by the proteasome (R-HSA-5610783)	59	3	0.11	+	26.84	0.000219	0.016
Degradation of GLI1 by the proteasome (R-HSA-5610780)	59	3	0.11	+	26.84	0.000219	0.0156
Dectin-1 mediated noncanonical NF-kB signaling (R-HSA-5607761)	59	3	0.11	+	26.84	0.000219	0.0151
Defective CFTR causes cystic fibrosis (R-HSA-5678895)	60	3	0.11	+	26.4	0.000229	0.015
Asymmetric localization of PCP proteins (R-HSA-4608870)	63	3	0.12	+	25.14	0.000263	0.0168
Autodegradation of Cdh1 by Cdh1:APC/C (R-HSA-174084)	63	3	0.12	+	25.14	0.000263	0.0164
Regulation of mRNA stability by proteins that bind AU-rich elements (R-HSA-450531)	85	4	0.16	+	24.84	2.37e-05	0.0118
Hedgehog ligand biogenesis (R-HSA-5358346)	64	3	0.12	+	24.75	0.000275	0.0167
Regulation of HMOX1 expression and activity (R-HSA-9707587)	64	3	0.12	+	24.75	0.000275	0.0163
p53-Dependent G1/S DNA damage checkpoint (R-HSA-69580)	64	3	0.12	+	24.75	0.000275	0.016
p53-Dependent G1 DNA Damage Response (R-HSA-69563)	64	3	0.12	+	24.75	0.000275	0.0156
Oxygen-dependent proline hydroxylation of Hypoxia-inducible Factor Alpha (R-HSA-1234176)	65	3	0.12	+	24.37	0.000288	0.0159
MAPK6/MAPK4 signaling (R-HSA-5687128)	88	4	0.17	+	24	2.7e-05	0.0112
Regulation of RAS by GAPs (R-HSA-5658442)	66	3	0.13	+	24	0.0003	0.0163
Activation of NF-kappaB in B cells (R-HSA-1169091)	66	3	0.13	+	24	0.0003	0.0159
G1/S DNA Damage Checkpoints (R-HSA-69615)	66	3	0.13	+	24	0.0003	0.0156
APC/C:Cdc20 mediated degradation of Securin (R-HSA-174154)	67	3	0.13	+	23.64	0.000313	0.0156
ER-Phagosome pathway (R-HSA-1236974)	90	4	0.17	+	23.46	2.94e-05	0.0105
Interferon alpha/beta signaling (R-HSA-909733)	68	3	0.13	+	23.29	0.000327	0.0157
Regulation of PTEN stability and activity (R-HSA-8948751)	68	3	0.13	+	23.29	0.000327	0.0154
Orc1 removal from chromatin (R-HSA-68949)	70	3	0.13	+	22.63	0.000355	0.0164
Regulation of RUNX2 expression and activity (R-HSA-8939902)	70	3	0.13	+	22.63	0.000355	0.0161
CDK-mediated phosphorylation and removal of Cdc6 (R-HSA-69017)	72	3	0.14	+	22	0.000384	0.0171
Cdc20:Phospho-APC/C mediated degradation of Cyclin A (R-HSA-174184)	72	3	0.14	+	22	0.000384	0.0168
APC:Cdc20 mediated degradation of cell cycle proteins prior to satisfation of the cell cycle checkpoint (R-HSA-179419)	73	3	0.14	+	21.7	0.000399	0.0172
APC/C:Cdh1 mediated degradation of Cdc20 and other APC/C:Cdh1 targeted proteins in late mitosis/early G1 (R-HSA-174178)	73	3	0.14	+	21.7	0.000399	0.0169
Cellular response to hypoxia (R-HSA-1234174)	74	3	0.14	+	21.4	0.000415	0.0172
APC/C:Cdc20 mediated degradation of mitotic proteins (R-HSA-176409)	75	3	0.14	+	21.12	0.000431	0.0176
Activation of APC/C and APC/C:Cdc20 mediated degradation of mitotic proteins (R-HSA-176814)	76	3	0.14	+	20.84	0.000447	0.018
ABC transporter disorders (R-HSA-5619084)	77	3	0.15	+	20.57	0.000464	0.0184
The role of GTSE1 in G2/M progression after G2 checkpoint (R-HSA-8852276)	78	3	0.15	+	20.3	0.000481	0.0188
Downstream signaling events of B Cell Receptor (BCR) (R-HSA-1168372)	79	3	0.15	+	20.05	0.000499	0.0191
Antiviral mechanism by IFN-stimulated genes (R-HSA-1169410)	79	3	0.15	+	20.05	0.000499	0.0188
Antigen processing-Cross presentation (R-HSA-1236975)	106	4	0.2	+	19.92	5.45e-05	0.017
Regulation of APC/C activators between G1/S and early anaphase (R-HSA-176408)	80	3	0.15	+	19.8	0.000517	0.0192
Signaling by NOTCH4 (R-HSA-9013694)	80	3	0.15	+	19.8	0.000517	0.019
Degradation of beta-catenin by the destruction complex (R-HSA-195253)	82	3	0.16	+	19.31	0.000554	0.0197
Cyclin E associated events during G1/S transition (R-HSA-69202)	82	3	0.16	+	19.31	0.000554	0.0195
Hedgehog 'on' state (R-HSA-5632684)	84	3	0.16	+	18.85	0.000593	0.0203
Cyclin A:Cdk2-associated events at S phase entry (R-HSA-69656)	84	3	0.16	+	18.85	0.000593	0.02
Regulation of mitotic cell cycle (R-HSA-453276)	87	3	0.16	+	18.2	0.000655	0.0215
APC/C-mediated degradation of cell cycle proteins (R-HSA-174143)	87	3	0.16	+	18.2	0.000655	0.0212
Cytoprotection by HMOX1 (R-HSA-9707564)	120	4	0.23	+	17.6	8.69e-05	0.0241
Switching of origins to a post-replicative state (R-HSA-69052)	90	3	0.17	+	17.6	0.000721	0.023
PCP/CE pathway (R-HSA-4086400)	91	3	0.17	+	17.4	0.000744	0.0235
Transcriptional regulation by RUNX3 (R-HSA-8878159)	93	3	0.18	+	17.03	0.000791	0.0243
Protein localization (R-HSA-9609507)	158	5	0.3	+	16.71	1.34e-05	0.00837
UCH proteinases (R-HSA-5689603)	95	3	0.18	+	16.67	0.000839	0.0255
CLEC7A (Dectin-1) signaling (R-HSA-5607764)	96	3	0.18	+	16.5	0.000864	0.026
TNFR2 non-canonical NF-kB pathway (R-HSA-5668541)	98	3	0.19	+	16.16	0.000916	0.0272
RUNX1 regulates transcription of genes involved in differentiation of HSCs (R-HSA-8939236)	98	3	0.19	+	16.16	0.000916	0.0269
Assembly of the pre-replicative complex (R-HSA-68867)	99	3	0.19	+	16	0.000943	0.0267
Interleukin-1 signaling (R-HSA-9020702)	100	3	0.19	+	15.84	0.00097	0.0272
ABC-family proteins mediated transport (R-HSA-382556)	102	3	0.19	+	15.53	0.00103	0.0284
Downstream TCR signaling (R-HSA-202424)	102	3	0.19	+	15.53	0.00103	0.0281
Beta-catenin independent WNT signaling (R-HSA-3858494)	142	4	0.27	+	14.87	0.000163	0.0194
Hedgehog 'off' state (R-HSA-5610787)	112	3	0.21	+	14.14	0.00133	0.0361
Cellular response to chemical stress (R-HSA-9711123)	154	4	0.29	+	13.71	0.000221	0.0149
DNA Replication Pre-Initiation (R-HSA-69002)	116	3	0.22	+	13.65	0.00147	0.0386
Transcriptional regulation by RUNX2 (R-HSA-8878166)	117	3	0.22	+	13.54	0.00151	0.0391
Synthesis of DNA (R-HSA-69239)	119	3	0.23	+	13.31	0.00158	0.0402
Host Interactions of HIV factors (R-HSA-162909)	124	3	0.23	+	12.77	0.00177	0.0446
TCR signaling (R-HSA-202403)	124	3	0.23	+	12.77	0.00177	0.0442
Respiratory electron transport, ATP synthesis by chemiosmotic coupling, and heat production by uncoupling proteins. (R-HSA-163200)	126	3	0.24	+	12.57	0.00185	0.0453
Regulation of expression of SLITs and ROBOs (R-HSA-9010553)	169	4	0.32	+	12.5	0.000313	0.0159
G1/S Transition (R-HSA-69206)	130	3	0.25	+	12.18	0.00202	0.048
Interferon Signaling (R-HSA-913531)	197	4	0.37	+	10.72	0.000551	0.0199
Signaling by NOTCH (R-HSA-157118)	201	4	0.38	+	10.51	0.000593	0.0205
Metabolism of amino acids and derivatives (R-HSA-71291)	369	7	0.7	+	10.01	5.88e-06	0.00489
Signaling by ROBO receptors (R-HSA-376176)	215	4	0.41	+	9.82	0.00076	0.0237
Mitotic Anaphase (R-HSA-68882)	227	4	0.43	+	9.3	0.000927	0.0269
Mitotic Metaphase and Anaphase (R-HSA-2555396)	228	4	0.43	+	9.26	0.000942	0.027
Metabolism of RNA (R-HSA-8953854)	661	6	1.25	+	4.79	0.00147	0.0389
Cytokine Signaling in Immune system (R-HSA-1280215)	697	6	1.32	+	4.54	0.00192	0.0459
Infectious disease (R-HSA-5663205)	895	7	1.7	+	4.13	0.00135	0.0361
Metabolism (R-HSA-1430728)	2087	16	3.95	+	4.05	4.92e-07	0.00123
Unclassified (UNCLASSIFIED)	10082	8	19.1	-	0.42	0.000327	0.016
